# Supplementary material for: Crispant analysis in zebrafish as a tool for rapid functional screening of disease-causing genes for bone fragility
Source: eLife. 2025 Jan 16;13:RP100060. doi: 10.7554/eLife.100060 (PMC11737869; doi:10.7554/eLife.100060)
Supplement: Figure 1—source data 1. [file elife-100060-fig1-data1.xlsx]

## Sheet: AR 7 dpf Randomization
Group 1			Group 2
1	20220223_7dpf_scrambled_103 kopie.tif		1	08042022_creb3l1_7dpf_AR_1008 kopie.tif
2	20220223_7dpf_sparc_5 kopie.tif		2	08042022_daam2_7dpf_AR_402 kopie.tif
3	20220223_7dpf_ifitm5_1009 kopie.tif		3	08042022_scrambled_7dpf_AR_301 kopie.tif
4	20220223_7dpf_sparc_101 kopie.tif		4	08042022_aldh7a1_7dpf_AR_201 kopie.tif
5	20220223_7dpf_sost_104 kopie.tif		5	08042022_creb3l1_7dpf_AR_802 kopie.tif
6	20220223_7dpf_serpinf1_202 kopie.tif		6	08042022_aldh7a1_7dpf_AR_501 kopie.tif
7	20220223_7dpf_sparc_306 kopie.tif		7	08042022_creb3l1_7dpf_AR_401 kopie.tif
8	20220223_7dpf_sost_502 kopie.tif		8	08042022_creb3l1_7dpf_AR_501 kopie.tif
9	20220223_7dpf_sec24d_902 kopie.tif		9	08042022_aldh7a1_7dpf_AR_602 kopie.tif
10	20220223_7dpf_scrambled_902 kopie.tif		10	08042022_daam2_7dpf_AR_901 kopie.tif
11	20220223_7dpf_sost_702 kopie.tif		11	08042022_aldh7a1_7dpf_AR_702 kopie.tif
12	20220223_7dpf_scrambled_402 kopie.tif		12	08042022_creb3l1_7dpf_AR_201 kopie.tif
13	20220223_7dpf_sec24d_1005 kopie.tif		13	08042022_scrambled_7dpf_AR_501 kopie.tif
14	20220223_7dpf_scrambled_1006 kopie.tif		14	08042022_creb3l1_7dpf_AR_301 kopie.tif
15	20220223_7dpf_ifitm5_402 kopie.tif		15	08042022_daam2_7dpf_AR_601 kopie.tif
16	20220223_7dpf_ifitm5_502 kopie.tif		16	08042022_creb3l1_7dpf_AR_101 kopie.tif
17	20220223_7dpf_ifitm5_302 kopie.tif		17	08042022_daam2_7dpf_AR_201 kopie.tif
18	20220223_7dpf_serpinf1_10 kopie.tif		18	08042022_daam2_7dpf_AR_301 kopie.tif
19	20220223_7dpf_esr1_901 kopie.tif		19	08042022_scrambled_7dpf_AR_401 kopie.tif
20	20220223_7dpf_sparc_404 kopie.tif		20	08042022_daam2_7dpf_AR_501 kopie.tif
21	20220223_7dpf_ifitm5_202 kopie.tif		21	08042022_creb3l1_7dpf_AR_601 kopie.tif
22	20220223_7dpf_mbtps2_103 kopie.tif		22	08042022_scrambled_7dpf_AR_101 kopie.tif
23	20220223_7dpf_sost_803 kopie.tif		23	08042022_scrambled_7dpf_AR_601 kopie.tif
24	20220223_7dpf_sparc_10 kopie.tif		24	08042022_aldh7a1_7dpf_AR_301 kopie.tif
25	20220223_7dpf_sec24d_602 kopie.tif		25	08042022_creb3l1_7dpf_AR_905 kopie.tif
26	20220223_7dpf_sec24d_401 kopie.tif		26	08042022_scrambled_7dpf_AR_702 kopie.tif
27	20220223_7dpf_sparc_201 kopie.tif		27	08042022_daam2_7dpf_AR_701 kopie.tif
28	20220223_7dpf_esr1_602 kopie.tif		28	08042022_daam2_7dpf_AR_801 kopie.tif
29	20220223_7dpf_ifitm5_602 kopie.tif		29	08042022_aldh7a1_7dpf_AR_101 kopie.tif
30	20220223_7dpf_sec24d_301 kopie.tif		30	08042022_aldh7a1_7dpf_AR_401 kopie.tif
31	20220223_7dpf_sparc_702 kopie.tif		31	08042022_creb3l1_7dpf_AR_701 kopie.tif
32	20220223_7dpf_ifitm5_803 kopie.tif		32	08042022_scrambled_7dpf_AR_202 kopie.tif
33	20220223_7dpf_esr1_202 kopie.tif		33	08042022_daam2_7dpf_AR_102 kopie.tif
34	20220223_7dpf_mbtps2_402 kopie.tif		34	08042022_scrambled_7dpf_AR_801 kopie.tif
35	20220223_7dpf_mbtps2_1006 kopie.tif		35	08042022_scrambled_7dpf_AR_901 kopie.tif
36	20220223_7dpf_serpinf1_501 kopie.tif		36	08042022_daam2_7dpf_AR_1005 kopie.tif
37	20220223_7dpf_scrambled_302 kopie.tif		37	08042022_aldh7a1_7dpf_AR_801 kopie.tif
38	20220223_7dpf_mbtps2_303 kopie.tif		38	08042022_scrambled_7dpf_AR_1001 kopie.tif
39	20220223_7dpf_sost_902 kopie.tif		39	08042022_aldh7a1_7dpf_AR_1002 kopie.tif
40	20220223_7dpf_serpinf1_601 kopie.tif		40	08042022_aldh7a1_7dpf_AR_901 kopie.tif
41	20220223_7dpf_scrambled_604 kopie.tif
42	20220223_7dpf_mbtps2_201 kopie.tif
43	20220223_7dpf_scrambled_7 kopie.tif
44	20220223_7dpf_mbtps2_502 kopie.tif
45	20220223_7dpf_scrambled_501 kopie.tif
46	20220223_7dpf_sparc_603 kopie.tif
47	20220223_7dpf_sec24d_801 kopie.tif
48	20220223_7dpf_ifitm5_902 kopie.tif
49	20220223_7dpf_sost_401 kopie.tif
50	20220223_7dpf_esr1_702 kopie.tif
51	20220223_7dpf_mbtps2_804 kopie.tif
52	20220223_7dpf_sparc_903 kopie.tif
53	20220223_7dpf_serpinf1_103 kopie.tif
54	20220223_7dpf_esr1_101 kopie.tif
55	20220223_7dpf_esr1_402 kopie.tif
56	20220223_7dpf_serpinf1_401 kopie.tif
57	20220223_7dpf_serpinf1_801 kopie.tif
58	20220223_7dpf_mbtps2_602 kopie.tif
59	20220223_7dpf_sost_1008 kopie.tif
60	20220223_7dpf_mbtps2_903 kopie.tif
61	20220223_7dpf_sec24d_102 kopie.tif
62	20220223_7dpf_sost_603 kopie.tif
63	20220223_7dpf_sost_201 kopie.tif
64	20220223_7dpf_serpinf1_901 kopie.tif
65	20220223_7dpf_esr1_301 kopie.tif
66	20220223_7dpf_serpinf1_702 kopie.tif
67	20220223_7dpf_sec24d_201 kopie.tif
68	20220223_7dpf_ifitm5_7 kopie.tif
69	20220223_7dpf_sec24d_501 kopie.tif
70	20220223_7dpf_esr1_802 kopie.tif
71	20220223_7dpf_scrambled_201 kopie.tif
72	20220223_7dpf_scrambled_803 kopie.tif
73	20220223_7dpf_serpinf1_301 kopie.tif
74	20220223_7dpf_ifitm5_102 kopie.tif
75	20220223_7dpf_sparc_802 kopie.tif
76	20220223_7dpf_esr1_501 kopie.tif
77	20220223_7dpf_mbtps2_701 kopie.tif
78	20220223_7dpf_sec24d_702 kopie.tif
79	20220223_7dpf_sost_302 kopie.tif
80	20220223_7dpf_esr1_1003 kopie.tif

## Sheet: AR 7 dpf surface area
Group 1						Group 2
Sample number	Measurement 1	Measurement 2	Measurement 3	Mean		Sample number	Measurement 1	Measurement 2	Measurement 3	Mean
1	99537	115921	106921	107460		1	100831	112526	109494	107617
2	102751	106036	107414	105400		2	108009	135361	135361	126244
3	105526	114323	119236	113028		3	150357	150357	136183	145632
4	118620	143132	132523	131425		4	148602	128311	137956	138290
5	117830	128692	113039	119854		5	131091	133930	125917	130313
6	89028	119575	113203	107269		6	116027	132859	132858	127248
7	96392	107716	100111	101406		7	109226	126896	126896	121006
8	87954	101787	87954	92565		8	93815	116071	97408	102431
9	77005	95323	73219	81849		9	116247	103918	112054	110740
10	105191	121779	92029	106333		10	130587	130587	117111	126095
11	96045	120537	96048	104210		11	101444	101444	101444	101444
12	88308	70675	76343	78442		12	135512	128191	121435	128379
13	98288	103858	85652	95932.7		13	159171	203416	139414	167334
14	114620	123521	114641	117594		14	154398	129649	119836	134628
15	96108	108595	81457	95386.7		15	97205	109162	109162	105176
16	120850	128819	120850	123506		16	126804	120248	114491	120514
17	95018	107549	91321	97962.7		17	126028	117933	107809	117257
18	78344	90830	90830	86668		18	160766	160766	148681	156738
19	112001	124007	124007	120005		19	130833	135681	130833	132449
20	108900	112751	121641	114431		20	127083	124086	127083	126084
21	96205	103943	92898	97682		21	135193	135193	131457	133948
22	94947	131653	126751	117784		22	119648	119651	115901	118400
23	85185	94351	106252	95262.7		23	153304	170881	148443	157543
24	98503	114620	98503	103875		24	84049	100174	100173	94798.7
25	77017	77025	77016	77019.3		25	155545	171304	114936	147262
26	87514	97990	83102	89535.3		26	113880	113880	104696	110819
27	97465	107519	113003	105996		27	97648	148224	116092	120655
28	100445	126622	112879	113315		28	114276	120651	127188	120705
29	80820	80821	80820	80820.3		29	95742	108307	100355	101468
30	73564	69316	69316	70732		30	128465	142393	123979	131612
31	101227	101228	91161	97872		31	110733	119179	93919	107944
32	92410	100470	81838	91572.7		32	141628	152500	141628	145252
33	104171	113852	125307	114443		33	151719	151719	151719	151719
34	119346	133090	104968	119135		34	135879	135876	118161	129972
35	90762	98239	87379	92126.7		35	137554	137554	124997	133368
36	117060	142423	125664	128382		36	118731	124405	115979	119705
37	102477	112019	112030	108842		37	114720	114720	108319	112586
38	100456	120473	120472	113800		38	139629	153260	139627	144172
39	83416	83437	72123	79658.7		39	96048	107346	99889	101094
40	112549	124851	100254	112551		40	98745	109027	101033	102935
41	113250	117120	121168	117179
42	109148	126383	122592	119374
43	89490	98888	85220	91199.3
44	115171	130822	119176	121723
45	109340	122658	117645	116548
46	101381	105714	110284	105793
47	82206	82204	69024	77811.3
48	88007	101073	106159	98413
49	59260	71723	67308	66097
50	105688	105693	132221	114534
51	84972	107380	95362	95904.7
52	107389	101816	123959	111055
53	111919	141916	141912	131916
54	101792	132212	72987	102330
55	91912	100312	105284	99169.3
56	107184	130952	130952	123029
57	106674	121530	115846	114683
58	99000	114943	110798	108247
59	112912	107077	87080	102356
60	92628	86321	92628	90525.7
61	92875	82982	79190	85015.7
62	93278	116436	93278	100997
63	98205	110992	110992	106730
64	74459	104041	93366	90622
65	87115	80416	74459	80663.3
66	96728	88428	96721	93959
67	70328	77866	77828	75340.7
68	118507	142026	136722	132418
69	69515	74297	86243	76685
70	120711	134981	158623	138105
71	123272	123273	127974	124840
72	99437	111968	121306	110904
73	122665	131807	146843	133772
74	90949	108903	90949	96933.7
75	102858	97931	108105	102965
76	114460	130600	125198	123419
77	114442	126094	135180	125239
78	75627	68089	68086	70600.7
79	78922	91720	91719	87453.7
80	121022	135084	157929	138012

## Sheet: AR 7 dpf notochord tip
Group 1						Group 2
Sample number	Measurement 1	Measurement 2	Measurement 3	Mean		Sample number	Measurement 1	Measurement 2	Measurement 3	Mean
1	27149	27489	24089	26242.3		1	29088	29091	29096	29091.7
2	32052	24245	22122	26139.7		2	24236	24922	25492	24883.3
3	33915	29004	28545	30488		3	30874	28388	28478	29246.7
4	38395	27794	30105	32098		4	19091	18861	22741	20231
5	32058	31802	32091	31983.7		5	30747	30063	31067	30625.7
6	32216	30952	31117	31428.3		6	23410	22379	22815	22868
7	30674	20990	25439	25701		7	28849	32245	32544	31212.7
8	32597	28919	27818	29778		8	30662	29453	30548	30221
9	28455	28678	28216	28449.7		9	24818	26518	26996	26110.7
10	25049	24692	22378	24039.7		10	28533	28420	28631	28528
11	27800	28072	27968	27946.7		11	29913	31214	29972	30366.3
12	22254	20960	17864	20359.3		12	31554	32062	33138	32251.3
13	30989	31537	30605	31043.7		13	26276	25636	29363	27091.7
14	29768	26209	28892	28289.7		14	31868	31999	34749	32872
15	31179	30002	28546	29909		15	32047	35392	34664	34034.3
16	26630	27903	26543	27025.3		16	31149	31501	32736	31795.3
17	30059	28855	29188	29367.3		17	23505	25445	23150	24033.3
18	29086	27691	27312	28029.7		18	31485	32745	31581	31937
19	25812	23230	24578	24540		19	25007	27350	25403	25920
20	27913	25591	29848	27784		20	25184	30672	24367	26741
21	36048	29106	32202	32452		21	33040	33689	35208	33979
22	28796	29340	30603	29579.7		22	22511	24599	24190	23766.7
23	28825	29613	28118	28852		23	30496	32470	30212	31059.3
24	33739	25803	29027	29523		24	20350	23261	23536	22382.3
25	27827	26208	26780	26938.3		25	21618	24352	20819	22263
26	29195	29928	30156	29759.7		26	14701	14090	13994	14261.7
27	28747	26279	27216	27414		27	25939	26067	26101	26035.7
28	29732	24462	28675	27623		28	22304	22745	22336	22461.7
29	32181	26554	25564	28099.7		29	25726	27232	27744	26900.7
30	29526	29080	29386	29330.7		30	32379	35247	34624	34083.3
31	30179	25811	31474	29154.7		31	28514	29635	28228	28792.3
32	33641	30313	26996	30316.7		32	25222	27449	26621	26430.7
33	25186	19685	22903	22591.3		33	25657	26127	26920	26234.7
34	34644	32455	32907	33335.3		34	26061	26995	25919	26325
35	22269	25273	25662	24401.3		35	26851	27278	29800	27976.3
36	32507	29699	32321	31509		36	30678	33341	34268	32762.3
37	28277	26731	28613	27873.7		37	24270	25556	23346	24390.7
38	25957	25950	28154	26687		38	25198	27503	26594	26431.7
39	27948	27595	29226	28256.3		39	26002	27341	27849	27064
40	29025	28178	29109	28770.7		40	25831	27331	28343	27168.3
41	30968	29745	32006	30906.3
42	33205	31247	32798	32416.7
43	30197	23073	24005	25758.3
44	35176	37221	39999	37465.3
45	24133	22155	20118	22135.3
46	27623	25645	27442	26903.3
47	28392	29556	31239	29729
48	29675	25860	33080	29538.3
49	20591	20643	19159	20131
50	23616	24363	28804	25594.3
51	28281	23705	32067	28017.7
52	25009	27212	23762	25327.7
53	29112	27032	29960	28701.3
54	24547	22190	24353	23696.7
55	21212	20477	20490	20726.3
56	29226	29389	30193	29602.7
57	29690	30256	31972	30639.3
58	28864	28396	29313	28857.7
59	29631	29896	31260	30262.3
60	27553	28641	27260	27818
61	25386	26943	27913	26747.3
62	29781	29237	28545	29187.7
63	29075	29365	29818	29419.3
64	24033	22695	24305	23677.7
65	18748	22436	34396	25193.3
66	30275	26823	30637	29245
67	27683	27300	27564	27515.7
68	33110	32360	30010	31826.7
69	22859	23522	24629	23670
70	32615	29856	28860	30443.7
71	37628	33175	34438	35080.3
72	28823	30634	30577	30011.3
73	32538	35098	36475	34703.7
74	32248	31377	35034	32886.3
75	28965	24875	27257	27032.3
76	23472	27952	28928	26784
77	31644	34365	36866	34291.7
78	28041	25536	27241	26939.3
79	28842	26939	32946	29575.7
80	31967	29933	28901	30267

## Sheet: Kaede 7 dpf Randomization
Group 1			Group 2
1	20220223_7dpf_serpinf1_303 kopie.tif		1	05042022_daam2_7dpf_kaede702 kopie.tif
2	20220223_7dpf_sec24d_503 kopie.tif		2	05042022_daam2_7dpf_kaede103 kopie.tif
3	20220223_7dpf_scrambled_403 kopie.tif		3	05042022_scrambled_7dpf_kaede101 kopie.tif
4	20220223_7dpf_sparc_402 kopie.tif		4	05042022_daam2_7dpf_kaede501 kopie.tif
5	20220223_7dpf_esr1_503 kopie.tif		5	05042022_aldh7a1_7dpf_kaede_401 kopie.tif
6	20220222_7dpf_sec24d_702 kopie.tif		6	05042022_aldh7a1_7dpf_kaede_602 kopie.tif
7	20220222_7dpf_sec24d_803 kopie.tif		7	05042022_aldh7a1_7dpf_kaede_803 kopie.tif
8	20220223_7dpf_sec24d_402 kopie.tif		8	05042022_scrambled_7dpf_kaede301 kopie.tif
9	20220223_7dpf_sparc_101 kopie.tif		9	05042022_aldh7a1_7dpf_kaede_705 kopie.tif
10	20220223_7dpf_serpinf1_203 kopie.tif		10	05042022_creb3l1_7dpf_kaede104 kopie.tif
11	20220215_7dpf_sparc_602 kopie.tif		11	05042022_daam2_7dpf_kaede604 kopie.tif
12	20220215_7dpf_ifitm5_702 kopie.tif		12	05042022_scrambled_7dpf_kaede602 kopie.tif
13	20220215_7dpf_mbtps_803 kopie.tif		13	05042022_daam2_7dpf_kaede802 kopie.tif
14	20220215_7dpf_mbtps_902 kopie.tif		14	05042022_creb3l1_7dpf_kaede802 kopie.tif
15	20220222_7dpf_sec24d_902 kopie.tif		15	05042022_aldh7a1_7dpf_kaede_303 kopie.tif
16	20220223_7dpf_esr1_203 kopie.tif		16	05042022_scrambled_7dpf_kaede202 kopie.tif
17	20220223_7dpf_ifitm5_204 kopie.tif		17	05042022_aldh7a1_7dpf_kaede_202 kopie.tif
18	20220223_7dpf_mbtps2_404 kopie.tif		18	05042022_creb3l1_7dpf_kaede703 kopie.tif
19	20220223_7dpf_sec24d_103 kopie.tif		19	05042022_scrambled_7dpf_kaede503 kopie.tif
20	20220222_7dpf_scrambled_803 kopie.tif		20	05042022_creb3l1_7dpf_kaede203 kopie.tif
21	20220223_7dpf_sost_203 kopie.tif		21	05042022_daam2_7dpf_kaede303 kopie.tif
22	20220223_7dpf_sparc_202 kopie.tif		22	05042022_aldh7a1_7dpf_kaede_502 kopie.tif
23	20220222_7dpf_sec24d_1003 kopie.tif		23	05042022_creb3l1_7dpf_kaede502 kopie.tif
24	20220223_7dpf_sost_501 kopie.tif		24	05042022_aldh7a1_7dpf_kaede_902 kopie.tif
25	20220215_7dpf_ifitm5_602 kopie.tif		25	05042022_scrambled_7dpf_kaede402 kopie.tif
26	20220222_7dpf_serpinf1_1003 kopie.tif		26	05042022_daam2_7dpf_kaede902 kopie.tif
27	20220215_7dpf_sost_702 kopie.tif		27	05042022_creb3l1_7dpf_kaede303 kopie.tif
28	20220222_7dpf_scrambled_903 kopie.tif		28	05042022_daam2_7dpf_kaede1007 kopie.tif
29	20220223_7dpf_ifitm5_403 kopie.tif		29	05042022_aldh7a1_7dpf_kaede_1010 kopie.tif
30	20220223_7dpf_sost_102 kopie.tif		30	05042022_daam2_7dpf_kaede201 kopie.tif
31	20220223_7dpf_sec24d_204 kopie.tif		31	05042022_daam2_7dpf_kaede402 kopie.tif
32	20220223_7dpf_sparc_504 kopie.tif		32	05042022_creb3l1_7dpf_kaede403 kopie.tif
33	20220223_7dpf_mbtps2_302 kopie.tif		33	05042022_scrambled_7dpf_kaede701 kopie.tif
34	20220223_7dpf_esr1_402 kopie.tif		34	05042022_creb3l1_7dpf_kaede602 kopie.tif
35	20220223_7dpf_mbtps2_502 kopie.tif		35	05042022_aldh7a1_7dpf_kaede_103 kopie.tif
36	20220223_7dpf_mbtps2_104 kopie.tif		36	05042022_creb3l1_7dpf_kaede902 kopie.tif
37	20220215_7dpf_ifitm5_1004 kopie.tif		37	05042022_scrambled_7dpf_kaede901 kopie.tif
38	20220223_7dpf_sparc_7 kopie.tif		38	05042022_creb3l1_7dpf_kaede1003 kopie.tif
39	20220215_7dpf_mbtps_703 kopie.tif		39	05042022_scrambled_7dpf_kaede1001 kopie.tif
40	20220215_7dpf_sost_604 kopie.tif		40	05042022_scrambled_7dpf_kaede802 kopie.tif
41	20220222_7dpf_scrambled_603 kopie.tif
42	20220223_7dpf_sec24d_302 kopie.tif
43	20220215_7dpf_sost_1003 kopie.tif
44	20220223_7dpf_scrambled_302 kopie.tif
45	20220215_7dpf_sost_903 kopie.tif
46	20220223_7dpf_sparc_302 kopie.tif
47	20220222_7dpf_serpinf1_902 kopie.tif
48	20220223_7dpf_sost_402 kopie.tif
49	20220222_7dpf_serpinf1_802 kopie.tif
50	20220222_7dpf_sec24d_603 kopie.tif
51	20220222_7dpf_serpinf1_702 kopie.tif
52	20220215_7dpf_ifitm5_902 kopie.tif
53	20220223_7dpf_ifitm5_302 kopie.tif
54	20220223_7dpf_sost_302 kopie.tif
55	20220215_7dpf_sost_804 kopie.tif
56	20220223_7dpf_esr1_302 kopie.tif
57	20220223_7dpf_serpinf1_403 kopie.tif
58	20220215_7dpf_mbtps_1003 kopie.tif
59	20220215_7dpf_mbtps_601 kopie.tif
60	20220223_7dpf_mbtps2_201 kopie.tif
61	20220223_7dpf_scrambled_501 kopie.tif
62	20220223_7dpf_ifitm5_102 kopie.tif
63	20220215_7dpf_ifitm5_802 kopie.tif
64	20220222_7dpf_esr1_603 kopie.tif
65	20220222_7dpf_scrambled_702 kopie.tif
66	20220223_7dpf_ifitm5_5 kopie.tif
67	20220223_7dpf_esr1_103 kopie.tif
68	20220223_7dpf_serpinf1_103 kopie.tif
69	20220222_7dpf_serpinf1_603 kopie.tif
70	20220222_7dpf_esr1_702 kopie.tif
71	20220223_7dpf_serpinf1_501 kopie.tif
72	20220222_7dpf_scrambled_1003 kopie.tif
73	20220223_7dpf_scrambled_102 kopie.tif
74	20220223_7dpf_scrambled_202 kopie.tif
75	20220222_7dpf_esr1_901 kopie.tif
76	20220222_7dpf_esr1_1002 kopie.tif
77	20220223_7dpf_sparc_1001 kopie.tif
78	20220222_7dpf_esr1_803 kopie.tif
79	20220223_7dpf_sparc_802 kopie.tif
80	20220223_7dpf_sparc_901 kopie.tif

## Sheet: Kaede 7 dpf osteoblasts
Group 1						Group 2
Sample number	Measurement 1	Measurement 2	Measurement 3	Mean		Sample number	Measurement 1	Measurement 2	Measurement 3	Mean
1	145193	141746	109875	132271		1	75368	70097	70097	71854
2	192305	205951	161707	186654		2	109830	104392	86581	100268
3	164916	178073	160716	167902		3	113036	103853	95592	104160
4	247881	195938	211614	218478		4	86514	77770	99497	87927
5	200071	161783	161783	174546		5	117732	94179	109148	107020
6	152009	105803	84087	113966		6	125349	109638	105968	113652
7	116422	104398	82452	101091		7	93565	107626	101631	100941
8	155337	151137	155337	153937		8	101622	108856	108856	106445
9	221026	197919	169135	196027		9	115701	110150	92189	106013
10	165844	157178	190185	171069		10	81045	90227	96830	89367.3
11	103539	76929	76929	85799		11	85363	73048	76022	78144.3
12	147624	118222	118222	128023		12	94243	90957	105494	96898
13	123282	111806	123282	119457		13	101987	83651	108310	97982.7
14	110220	71252	86854	89442		14	105925	95455	105925	102435
15	150693	134102	114567	133121		15	86155	90241	86150	87515.3
16	171493	180912	145468	165958		16	94243	94243	101539	96675
17	170878	178791	195876	181848		17	102761	85359	94816	94312
18	148808	167645	119367	145273		18	100416	90918	88713	93349
19	137015	143431	113361	131269		19	101296	89869	77083	89416
20	122526	122527	122527	122527		20	62883	87394	102671	84316
21	189055	149779	149779	162871		21	59002	74367	57932	63767
22	170598	100125	100125	123616		22	113612	91581	99899	101697
23	133239	108081	102558	114626		23	82963	82963	65344	77090
24	157706	142830	157706	152747		24	88169	100697	86390	91752
25	126018	70875	70875	89256		25	71377	81372	89376	80708.3
26	110902	105183	116819	110968		26	58119	73862	58119	63366.7
27	137389	99366	99366	112040		27	83862	83862	67763	78495.7
28	168263	122927	122927	138039		28	93292	87074	78322	86229.3
29	160791	139735	126212	142246		29	97447	100121	87483	95017
30	143001	143001	162732	149578		30	98582	67050	70773	78801.7
31	138830	72993	72993	94938.7		31	107473	107473	107473	107473
32	147969	140906	170449	153108		32	87108	83862	72651	81207
33	192842	172997	177664	181168		33	108856	92027	98245	99709.3
34	171607	161415	164689	165904		34	104332	110428	89390	101383
35	136580	144460	156429	145823		35	57896	57896	57896	57896
36	152607	129683	129683	137324		36	113358	91482	91482	98774
37	162070	134025	144527	146874		37	110054	93077	98842	100658
38	152593	136357	122317	137089		38	105002	111743	89100	101948
39	146677	139346	132391	139471		39	108323	92033	97046	99134
40	125869	125869	91100	114279		40	109066	91877	98443	99795.3
41	157252	119172	119169	131864
42	143358	143358	143358	143358
43	87132	90211	113398	96913.7
44	172064	128240	143985	148096
45	151455	84697	84697	106950
46	200034	156798	164785	173872
47	165322	136587	150296	150735
48	206916	206916	176052	196628
49	144982	157856	157856	153565
50	79199	79199	79199	79199
51	137307	166845	151119	151757
52	150123	112260	112260	124881
53	149953	149953	149953	149953
54	160574	189337	137025	162312
55	105274	82913	82913	90366.7
56	140256	150893	210795	167315
57	134126	134126	134126	134126
58	123685	162962	148867	145171
59	165360	194609	143732	167900
60	156946	136975	152533	148818
61	147515	135502	119873	134297
62	122764	122763	122763	122763
63	100063	72708	72708	81826.3
64	129099	159157	159157	149138
65	135682	169691	139999	148457
66	160706	184168	200249	181708
67	186343	221255	273363	226987
68	157675	157675	157675	157675
69	105259	85813	136915	109329
70	110539	127740	140803	126361
71	189330	184075	231969	201791
72	137160	130410	130410	132660
73	148127	133193	157711	146344
74	140711	140711	140711	140711
75	196249	222281	269364	229298
76	130067	160037	159182	149762
77	200101	157792	163979	173957
78	129099	159217	160151	149489
79	199839	157001	162315	173052
80	199721	157792	165185	174233

## Sheet: AR 14 dpf Randomization
Group 1			Group 2
1	20220303_14dpf_mbtps2_10001 kopie.tif		1	creb3l1_90dpf_AR_F7_.tif
2	20220303_14dpf_sost_904 kopie.tif		2	scrambled_90dpf_AR_F9_.tif
3	20220303_14dpf_sec24d_702 kopie.tif		3	daam2_90dpf_AR_F801.tif
4	20220303_14dpf_ifitm5_401 kopie.tif		4	scrambled_90dpf_AR_F1_01.tif
5	20220303_14dpf_sost_702 kopie.tif		5	scrambled_90dpf_AR_F6_ .tif
6	20220303_14dpf_mbtps2_801 kopie.tif		6	aldh7a1_90dpf_AR_F8.tif
7	20220303_14dpf_ifitm5_802 kopie.tif		7	daam2_90dpf_AR_F1.tif
8	20220303_14dpf_ifitm5_901 kopie.tif		8	daam2_90dpf_AR_F701.tif
9	20220303_14dpf_mbtps2_502 kopie.tif		9	daam2_90dpf_AR_F501.tif
10	20220303_14dpf_esr1_402 kopie.tif		10	daam2_90dpf_AR_F4.tif
11	20220303_14dpf_serpinf1_1 kopie.tif		11	scrambled_90dpf_AR_F5_.tif
12	20220303_14dpf_serpinf1_304 kopie.tif		12	creb3l1_90dpf_AR_F10_.tif
13	20220303_14dpf_sec24d_901 kopie.tif		13	daam2_90dpf_AR_F2.tif
14	20220303_14dpf_sparc_802 kopie.tif		14	aldh7a1_90dpf_AR_F903.tif
15	20220303_14dpf_scrambled_801 kopie.tif		15	creb3l1_90dpf_AR_F6_.tif
16	20220303_14dpf_sec24d_501 kopie.tif		16	scrambled_90dpf_AR_F7_.tif
17	20220303_14dpf_sost_602 kopie.tif		17	aldh7a1_90dpf_AR_F501.tif
18	20220303_14dpf_esr1_201 kopie.tif		18	creb3l1_90dpf_AR_F4_.tif
19	20220303_14dpf_sparc_1kopie.tif		19	scrambled_90dpf_AR_F2_.tif
20	20220303_14dpf_sec24d_301 kopie.tif		20	scrambled_90dpf_AR_F10_.tif
21	20220303_14dpf_sparc_702 kopie.tif		21	creb3l1_90dpf_AR_F8_.tif
22	20220303_14dpf_scrambled_100 kopie.tif		22	scrambled_90dpf_AR_F3_01.tif
23	20220303_14dpf_sparc_9 kopie.tif		23	creb3l1_90dpf_AR_F5_01.tif
24	20220303_14dpf_sost_801 kopie.tif		24	daam2_90dpf_AR_F6.tif
25	20220303_14dpf_serpinf1_802 kopie.tif		25	creb3l1_90dpf_AR_F3_.tif
26	20220303_14dpf_sost_302 kopie.tif		26	aldh7a1_90dpf_AR_F2.tif
27	20220303_14dpf_ifitm5_704 kopie.tif		27	aldh7a1_90dpf_AR_F401.tif
28	20220303_14dpf_sec24d_104 kopie.tif		28	aldh7a1_90dpf_AR_F7.tif
29	20220303_14dpf_ifitm5_1002 kopie.tif		29	daam2_90dpf_AR_F9.tif
30	20220303_14dpf_scrambled_201 kopie.tif		30	aldh7a1_90dpf_AR_F6.tif
31	20220303_14dpf_scrambled_10001 kopie.tif		31	creb3l1_90dpf_AR_F9_.tif
32	20220303_14dpf_scrambled_901 kopie.tif		32	daam2_90dpf_AR_F1002.tif
33	20220303_14dpf_esr1_703 kopie.tif		33	daam2_90dpf_AR_F301.tif
34	20220303_14dpf_sec24d_801 kopie.tif		34	aldh7a1_90dpf_AR_F1.tif
35	20220303_14dpf_serpinf1_603 kopie.tif		35	creb3l1_90dpf_AR_F2_.tif
36	20220303_14dpf_sost_204 kopie.tif		36	scrambled_90dpf_AR_F4_
37	20220303_14dpf_sost_10004 kopie.tif		37	aldh7a1_90dpf_AR_F3.tif
38	20220303_14dpf_ifitm5_302 kopie.tif		38	scrambled_90dpf_AR_F8_
39	20220303_14dpf_ifitm5_203 kopie.tif		39	aldh7a1_90dpf_AR_F10.tif
40	20220303_14dpf_sparc_401 kopie.tif		40	creb3l1_90dpf_AR_F1_.tif
41	20220303_14dpf_mbtps2_302 kopie.tif
42	20220303_14dpf_esr1_301 kopie.tif
43	20220303_14dpf_mbtps2_903 kopie.tif
44	20220303_14dpf_mbtps2_601 kopie.tif
45	20220303_14dpf_ifitm5_1 kopie.tif
46	20220303_14dpf_sparc_502 kopie.tif
47	20220303_14dpf_sec24d_402 kopie.tif
48	20220303_14dpf_sec24d_602 kopie.tif
49	20220303_14dpf_serpinf1_902 kopie.tif
50	20220303_14dpf_serpinf1_404 kopie.tif
51	20220303_14dpf_serpinf1_701 kopie.tif
52	20220303_14dpf_scrambled_503 kopie.tif
53	20220303_14dpf_scrambled_303 kopie.tif
54	20220303_14dpf_ifitm5_603 kopie.tif
55	20220303_14dpf_esr1_102 kopie.tif
56	20220303_14dpf_scrambled_603 kopie.tif
57	20220303_14dpf_esr1_606 kopie.tif
58	20220303_14dpf_esr1_502 kopie.tif
59	20220303_14dpf_sec24d_10001 kopie.tif
60	20220303_14dpf_ifitm5_504 kopie.tif
61	20220303_14dpf_serpinf1_201 kopie.tif
62	20220303_14dpf_scrambled_401 kopie.tif
63	20220303_14dpf_sost_402 kopie.tif
64	20220303_14dpf_sec24d_201 kopie.tif
65	20220303_14dpf_mbtps2_100 kopie.tif
66	20220303_14dpf_sost_506 kopie.tif
67	20220303_14dpf_sparc_602 kopie.tif
68	20220303_14dpf_sparc_202 kopie.tif
69	20220303_14dpf_sparc_301 kopie.tif
70	20220303_14dpf_mbtps2_401 kopie.tif
71	20220303_14dpf_serpinf1_502 kopie.tif
72	20220303_14dpf_mbtps2_702 kopie.tif
73	20220303_14dpf_serpinf1_10002 kopie.tif
74	20220303_14dpf_scrambled_702 kopie.tif
75	20220303_14dpf_sost_104 kopie.tif
76	20220303_14dpf_serpinf1_10008 kopie.tif
77	20220303_14dpf_esr1_805 kopie.tif
78	20220303_14dpf_esr1_1001 kopie.tif
79	20220303_14dpf_sparc_1002 kopie.tif
80	20220303_14dpf_esr1_903 kopie.tif

## Sheet: AR 14 dpf surface area
Group 1						Group 2
Sample number	Measurement 1	Measurement 2	Measurement 3	Mean		Sample number	Measurement 1	Measurement 2	Measurement 3	Mean
1	12042	13148	12582	12590.7		1	7678	11601	12424	10567.7
2	8336	10785	7817	8979.33		2	10379	18036	18050	15488.3
3	8426	8426	8828	8560		3	8886	12299	11077	10754
4	9462	10259	10762	10161		4	11652	20639	16771	16354
5	10846	10005	10400	10417		5	12527	12527	13658	12904
6	8887	10037	9332	9418.67		6	12956	18492	12956	14801.3
7	13745	16509	15053	15102.3		7	11888	15396	14541	13941.7
8	13820	17651	16042	15837.7		8	15242	22132	11970	16448
9	9277	9759	10722	9919.33		9	9249	15702	8153	11034.7
10	14450	15871	13004	14441.7		10	15269	15269	15275	15271
11	10023	12521	10023	10855.7		11	18585	18542	19840	18989
12	13093	16630	13889	14537.3		12	20157	23570	23551	22426
13	8434	8822	9715	8990.33		13	13502	15136	19054	15897.3
14	8733	9902	8733	9122.67		14	7823	8141	7494	7819.33
15	5858	5321	5692	5623.67		15	12294	17733	13373	14466.7
16	8413	9891	9101	9135		16	10239	14792	12527	12519.3
17	12544	12076	12063	12227.7		17	9759	15858	12433	12683.3
18	19272	19272	19272	19272		18	13296	14817	13494	13869
19	11142	11142	10572	10952		19	14792	12527	12527	13282
20	7535	8825	7534	7964.67		20	16770	19313	18036	18039.7
21	13081	16853	13823	14585.7		21	12048	14314	11456	12606
22	10456	9888	8721	9688.33		22	17358	14981	18586	16975
23	10869	9253	9599	9907		23	12177	16360	14462	14333
24	7225	8802	7431	7819.33		24	14622	15684	14620	14975.3
25	11026	11492	9257	10591.7		25	18574	18357	20423	19118
26	11693	12241	10598	11510.7		26	11816	13055	10722	11864.3
27	14999	16849	13398	15082		27	15208	16441	12979	14876
28	8332	15558	16362	13417.3		28	16724	15421	14215	15453.3
29	16043	21040	17914	18332.3		29	10545	20430	17517	16164
30	8485	10115	8075	8891.67		30	9466	9038	12758	10420.7
31	8951	9717	9211	9293		31	13527	13528	10862	12639
32	7461	7461	6552	7158		32	12679	17502	11359	13846.7
33	11466	12208	15954	13209.3		33	15642	20927	14349	16972.7
34	7310	8488	7672	7823.33		34	12342	16643	13183	14056
35	16709	15770	17620	16699.7		35	12775	25835	15823	18144.3
36	15447	13778	13778	14334.3		36	17393	24341	17358	19697.3
37	8010	9364	8685	8686.33		37	14529	18522	14529	15860
38	10846	11754	10000	10866.7		38	16889	24248	17532	19556.3
39	16887	21089	19546	19174		39	12450	16764	13321	14178.3
40	12120	12120	11160	11800		40	12934	25663	15902	18166.3
41	12133	11390	9859	11127.3
42	15251	13971	13308	14176.7
43	10156	10156	9769	10027
44	12171	12171	13062	12468
45	5547	7701	5788	6345.33
46	8231	10884	13438	10851
47	7829	9155	13179	10054.3
48	9037	8635	9037	8903
49	16551	16551	17609	16903.7
50	17695	16310	20660	18221.7
51	14986	21093	17552	17877
52	20159	21470	24265	21964.7
53	10198	12042	14445	12228.3
54	11889	12354	16848	13697
55	12082	13103	13103	12762.7
56	8621	8229	11449	9433
57	17027	17488	24217	19577.3
58	11565	13506	13506	12859
59	5778	4552	5457	5262.33
60	12125	14569	14569	13754.3
61	12812	11446	12812	12356.7
62	10938	11649	12056	11547.7
63	10519	13295	11872	11895.3
64	7873	10057	11855	9928.33
65	8822	9926	9926	9558
66	16354	20648	20648	19216.7
67	10479	10986	10986	10817
68	10459	8977	8977	9471
69	8406	7706	9941	8684.33
70	8865	11142	11517	10508
71	11462	10930	8123	10171.7
72	9663	9117	10172	9650.67
73	9672	8573	8573	8939.33
74	13936	13936	18945	15605.7
75	15385	17024	17024	16477.7
76	10571	10222	9327	10040
77	10562	11418	11418	11132.7
78	16927	17599	23987	19504.3
79	10498	10884	11003	10795
80	12001	13673	13493	13055.7

## Sheet: AR 14 dpf Mineralized vertebrae
Group 1			Group 2
Sample number	Number of vertebrae		Sample number	Number of vertebrae
1	7		1	6
2	5		2	4
3	0		3	6
4	12		4	5
5	8		5	6
6	4		6	15
7	15		7	0
8	19		8	0
9	6		9	5
10	17		10	6
11	15		11	25
12	23		12	14
13	5		13	13
14	0		14	0
15	0		15	13
16	0		16	24
17	13		17	6
18	24		18	16
19	10		19	9
20	0		20	5
21	17		21	3
22	5		22	3
23	3		23	10
24	0		24	2
25	10		25	13
26	12		26	5
27	25		27	10
28	15		28	4
29	23		29	8
30	9		30	10
31	5		31	8
32	4		32	0
33	16		33	8
34	6		34	8
35	21		35	17
36	12		36	12
37	8		37	13
38	8		38	0
39	25		39	12
40	11		40	13
41	6
42	2
43	0
44	9
45	0
46	13
47	11
48	2
49	18
50	25
51	21
52	25
53	3
54	21
55	17
56	6
57	23
58	0
59	0
60	17
61	17
62	12
63	8
64	2
65	7
66	22
67	14
68	6
69	6
70	0
71	15
72	5
73	15
74	24
75	26
76	17
77	14
78	19
79	2
80	8

## Sheet: AR 14 dpf notochord tip 
Group 1						Group 2
Sample number	Measurement 1	Measurement 2	Measurement 3	Mean		Sample number	Measurement 1	Measurement 2	Measurement 3	Mean
1	2180	2589	2306	2358.33		1	3603	4279	3593	3825
2	1795	1939	1870	1868		2	2908	3872	3647	3475.67
3	1782	1722	1835	1779.67		3	3044	2917	3287	3082.67
4	2209	2221	2264	2231.33		4	3541	3547	4115	3734.33
5	1805	1872	1799	1825.33		5	3314	3217	3364	3298.33
6	1854	1894	1955	1901		6	5629	5438	5616	5561
7	2130	2184	2168	2160.67		7	3091	2815	3166	3024
8	2447	2316	2502	2421.67		8	3208	3378	3809	3465
9	2068	2266	2333	2222.33		9	3162	3460	3151	3257.67
10	1910	2235	1897	2014		10	3326	3299	3114	3246.33
11	1944	2029	2006	1993		11	4030	4146	3913	4029.67
12	2025	2380	2256	2220.33		12	4058	4351	3916	4108.33
13	2119	2256	2161	2178.67		13	4331	4593	4621	4515
14	2019	1877	1976	1957.33		14	1678	1943	1924	1848.33
15	1300	1137	1295	1244		15	3534	3650	3785	3656.33
16	2256	2411	2219	2295.33		16	3086	3151	3223	3153.33
17	2425	2598	2308	2443.67		17	3283	3523	3569	3458.33
18	2630	2676	2694	2666.67		18	4122	6200	3808	4710
19	1743	2132	1593	1822.67		19	3304	3790	2926	3340
20	1664	2053	1672	1796.33		20	4864	4030	3652	4182
21	2386	2605	2565	2518.67		21	3346	3342	3606	3431.33
22	1625	1612	1685	1640.67		22	4398	3490	3629	3839
23	1507	1967	1649	1707.67		23	3361	3193	2754	3102.67
24	1937	1827	2038	1934		24	3289	3303	3656	3416
25	1624	1745	1520	1629.67		25	4007	3427	3636	3690
26	1974	2744	2089	2269		26	3903	3782	3839	3841.33
27	2431	2002	2170	2201		27	5676	5676	4529	5293.67
28	2250	2579	2319	2382.67		28	3187	2925	2783	2965
29	2792	2947	2968	2902.33		29	3962	3499	3736	3732.33
30	1868	1974	1795	1879		30	3287	2935	2856	3026
31	1355	1783	1658	1598.67		31	3108	4170	3065	3447.67
32	1931	2167	1975	2024.33		32	3289	3610	3311	3403.33
33	2523	2584	2668	2591.67		33	4095	3862	3943	3966.67
34	2024	2153	2122	2099.67		34	3264	3015	3445	3241.33
35	1749	2649	2030	2142.67		35	4608	4213	2889	3903.33
36	2074	2648	2569	2430.33		36	4283	3828	3902	4004.33
37	2075	1894	1953	1974		37	4392	4042	3511	3981.67
38	2415	2705	2672	2597.33		38	4303	3901	3933	4045.67
39	2696	2649	2677	2674		39	3311	2988	3311	3203.33
40	1998	2071	2176	2081.67		40	4354	4312	2899	3855
41	2239	2420	2193	2284
42	2446	2401	2552	2466.33
43	1314	1416	1421	1383.67
44	2004	3027	2231	2420.67
45	1857	1779	1884	1840
46	2061	1801	1879	1913.67
47	2304	2444	2318	2355.33
48	2232	2216	2368	2272
49	2633	3118	2664	2805
50	2261	2977	2603	2613.67
51	2494	2475	2469	2479.33
52	2961	2915	3228	3034.67
53	1731	1666	1642	1679.67
54	2866	2717	2817	2800
55	2153	2860	2476	2496.33
56	1898	2140	1944	1994
57	4215	3773	4318	4102
58	2636	2206	2319	2387
59	1796	1760	1647	1734.33
60	2742	2538	2622	2634
61	2529	2794	2523	2615.33
62	1990	2115	1968	2024.33
63	2578	2428	2513	2506.33
64	2131	1929	2471	2177
65	2295	2183	2570	2349.33
66	4508	4084	3076	3889.33
67	3142	2561	3173	2958.67
68	1997	1873	1898	1922.67
69	1995	1882	1972	1949.67
70	2167	1881	1988	2012
71	2183	2465	2253	2300.33
72	2199	2043	1830	2024
73	1566	1747	1835	1716
74	2593	2634	2574	2600.33
75	2378	2745	3088	2737
76	2469	2431	2269	2389.67
77	2620	2877	2516	2671
78	4195	3913	4138	4082
79	3292	2981	2767	3013.33
80	2738	2196	2114	2349.33

## Sheet: AR 14 dpf operculum 
Group 1						Group 2
Sample number	Measurement 1	Measurement 2	Measurement 3	Mean		Sample number	Measurement 1	Measurement 2	Measurement 3	Mean
1	872	994	934	933.333		1	1737	1636	1558	1643.67
2	1536	1609	1507	1550.67		2	2058	2218	2162	2146
3	653	847	795	765		3	2275	2307	2380	2343.5
4	1208	1202	1130	1180		4	2630	2862	2850	2780.67
5	1067	885	1166	1039.33		5	1940	1625	1764	1776.33
6	1055	1005	994	1018		6	3128	3164	3399	3230.33
7	1772	1616	1468	1618.67		7	1370	1444	1477	1430.33
8	1677	1633	1607	1639		8	2296	2333	2108	2245.67
9	1258	1264	1270	1264		9	1957	2028	2147	2087.5
10	1283	1328	1480	1363.67		10	1915	2000	2277	2064
11	969	1169	1093	1077		11	2688	2957	2585	2743.33
12	2508	2485	2539	2496.5		12	3860	4075	3638	3857.67
13	1099	969	1073	1047		13	2508	2351	2796	2573.5
14	407	692	816	638.333		14	343	451	408	400.667
15	1380	1337	1418	1378.33		15	1784	1860	1542	1728.67
16	654	737	633	674.667		16	1797	1829	1647	1757.67
17	1698	1839	1591	1768.5		17	2325	2422	2722	2489.67
18	2597	3455	2847	2966.33		18	2856	2736	2808	2800
19	1293	1285	1210	1262.67		19	1624	1768	1834	1742
20	679	422	370	550.5		20	2575	2265	2268	2369.33
21	2448	2523	2730	2567		21	991	1105	1001	1032.33
22	1372	1172	1299	1281		22	2101	2197	2190	2162.67
23	910	976	984	956.667		23	1825	1853	1705	1794.33
24	664	668	585	639		24	1128	1150	1080	1119.33
25	985	939	1019	981		25	1939	2121	2200	2086.67
26	1550	1588	1589	1569		26	1369	1482	1620	1490.33
27	2685	2459	2637	2593.67		27	1860	1804	2042	1902
28	1911	1959	2127	1999		28	1601	1666	1695	1654
29	801	864	860	841.667		29	1694	1520	1731	1648.33
30	897	1013	1123	1011		30	1606	1865	1657	1709.33
31	1934	1562	1937	1811		31	3558	3770	3542	3623.33
32	3162	2855	3053	3023.33		32	1758	1702	1725	1728.33
33	1265	1294	1347	1302		33	1725	1515	1648	1629.33
34	768	574	707	683		34	1950	1863	2100	1971
35	2765	2956	2783	2860.5		35	3298	3375	3621	3431.33
36	2234	2165	2175	2191.33		36	2464	2767	2922	2717.67
37	1165	1175	965	1101.67		37	3121	3372	3088	3193.67
38	1235	1185	1262	1210		38	2274	2366	2091	2243.67
39	3039	2483	2794	2772		39	1008	1188	1205	1133.67
40	998	1181	1130	1103		40	3515	2867	2727	3036.33
41	905	1054	1047	979.5
42	1137	1304	1210	1220.5
43	945	981	891	939
44	1490	1460	1305	1475
45	2088	1968	2008	2021.33
46	1506	1437	1240	1394.33
47	982	934	1135	1017
48	711	684	742	697.5
49	2592	2647	2642	2627
50	3694	3747	4079	3840
51	2973	2787	2963	2907.67
52	3151	2844	2816	2937
53	1213	1330	1185	1271.5
54	2385	2493	2728	2439
55	2678	2946	2697	2773.67
56	997	888	992	942.5
57	4381	5059	4761	4720
58	1298	1543	1697	1512.67
59	228	186	201	205
60	1993	1867	1787	1882.33
61	1438	1525	1438	1467
62	1520	1411	1247	1392.67
63	1956	2086	1972	2004.67
64	1001	829	967	932.333
65	3334	3255	3142	3243.67
66	4874	4517	4629	4673.33
67	1043	1210	998	1126.5
68	1360	1366	1328	1363
69	1516	1449	1394	1453
70	1060	1073	1114	1082.33
71	1510	1484	1521	1505
72	1106	1305	1333	1248
73	800	1028	839	889
74	2878	3191	2916	2995
75	3548	3599	3782	3643
76	752	819	757	785.5
77	1283	1340	1394	1339
78	4671	5001	4781	4836
79	1290	1305	1324	1297.5
80	4981	5023	4911	4971.67

[truncated: 3 more sheets: Kaede 14 dpf Randomization, Kaede 14 dpf osteoblasts, Kaede 14 dpf operculum]
