# Supplementary material for: Crispant analysis in zebrafish as a tool for rapid functional screening of disease-causing genes for bone fragility
Source: eLife. 2025 Jan 16;13:RP100060. doi: 10.7554/eLife.100060 (PMC11737869; doi:10.7554/eLife.100060)
Supplement: Figure 2—source data 1. [file elife-100060-fig2-data1.xlsx]

## Sheet: 7 dpf 
runx2												sp7												bglap												col1a1a
scrambled	aldh7a1	daam2	esr1	sost	creb3l1	ifitm5	mbtps2	sec24d	serpinf1	sparc		scrambled	aldh7a1	daam2	esr1	sost	creb3l1	ifitm5	mbtps2	sec24d	serpinf1	sparc		scrambled	aldh7a1	daam2	esr1	sost	creb3l1	ifitm5	mbtps2	sec24d	serpinf1	sparc		0.768028	2.95395	3.90091	5.1086	0.889307	2.22925	1.46754	0.684999	2.17202	1.56789	1.83399
0.824283	0.867916	1.05714	0.716149	0.996429	1.90745	1.2381	0.606937	1.41333	1.13929	1.72686		0.727053	1.52174	1.4663	1.47343	0.910747	1.94494	1.96721	1.25509	1.15137	0.831512	2.40257		0.727273	0.356364	0.424538	0.294788	0.671108	0.413104	0.361404	1.39616	0.185212	0.314675	0.750646		1.20938	3.42311	2.38319	3.07559	1.61806	0.893281	1.07118	0.897604	1.68375	1.76858	1.88142
0.824283	0.867916	1.38095	1.63149	1.29762	1.28668	1.71429	0.789796	0.932416	0.82619	1.25282		0.71256	0.568438	1.36612	0.966184	1.04736	1.55881	0.867942	0.941532	1.39291	0.505464	2.38827		0.921212	0.346667	0.366872	0.358303	0.411613	0.292305	0.349473	1.1538	0.518788	0.199344	0.730762		0.792354	2.78019	3.09815	1.73762	0.916902	0.727273	0.898087	0.592171	1.92876	1.07118	1.27273
0.937159	1.84017	1.33333	1.48921	0.910714	1.03273	1.46429	0.578193	0.0177377	1.2381	0.878104		0.99839	1.46538	1.26594	1.28019	0.64663	0.863783	0.714936	1.06294	0.933977	1.22951	1.88774		0.926061	0.439273	0.37234	0.446545	0.686021	0.213263	0.433486	0.997551	0.208	0.328594	1.04395		1.23023	2.43267	1.89401	3.98645	1.10505	0.542292	1.0461	0.375475	1.16768	1.14644	1.89723
1.00545	1.46075	0.807143	1.2596	1.14524	1.2754	1.20238	1.99546	0.933365	1.34524	0.825056		1.562	0.00079227	0.607468	1.15984	0.678506	0.836611	0.919854	1.56994	1.0628	0.947177	2.35967		1.42545	0.415987	0.227679	0.378921	0.440943	0.29827	0.348479		0.235152	0.368861	0.949493		1.20539				0.470367	1.54941	0.91063		1.5013	1.5428	1.52253
1.2331	1.20465			0.759524	0.950339	1.1131		0.811952	1.4881	0.764108		1.25683				0.528233	2.21666	0.753188		0.869565	0.903461	2.04505		1.09366				0.416584	0.403659	0.228177		0.346182	0.385763	1.22788		1.44246
1.36905												1.22951												1.80453												0.95704
0.816667												0.684882												0.989262												0.395108
0.814286												0.435337												0.666136												0.883794
0.959368												1.39344												0.446411												1.40553
0.772009												1.23561												0.666136												1.6917
0.620767												1.00965												0.446411												0.0189723
1.64786												0.460493												1.09366												1.00195
0.71883												1.29424												1.80453												1.35693
0.615231												0.694301												0.989262												0.987842
0.704289												0.626943												0.860262												1.28094
0.707924												1.21244												1.12445												0.37234
2.25373												0.898964												0.825328												1.9442
1.83994												1.56736												1.18996												0.661627
0.89813												1.22921												0.742942												0.537467
0.468024												0.848586												0.911564												0.856705
0.793902												0.772785												0.83589
												1.14942												1.5096

## Sheet: 14 dpf
runx2												sp7												bglap												col1a1a
1.59603	0.756537	1.2624	0.689811	1.055	1.0009	0.960388	0.720304	2.84941	0.7367	1.49881		scrambled	aldh7a1	daam2	esr1	sost	creb3l1	ifitm5	mbtps2	sec24d	serpinf1	sparc		scrambled	aldh7a1	daam2	esr1	sost	creb3l1	ifitm5	mbtps2	sec24d	serpinf1	sparc		scrambled	aldh7a1	daam2	esr1	sost	creb3l1	ifitm5	mbtps2	sec24d	serpinf1	sparc
0.567178	0.607755	1.10911	0.604148	0.726781	0.675383	1.47514	0.930697	1.70424	0.964833	1.887		1.60906	0.845252	1.8673	0.688319	1.35081	1.45014	0.685783	0.309872	2.01629	0.898888	1.23256		1.38274	0.309181	0.768805	0.366704	0.419248	0.532633	1.00361	0.30527	1.10066	0.457965	0.782443		0.859688	2.08686	4.61024	1.65033	2.73942	3.67483	3.04773	6.15759	5.94655	2.62806	0.407797
1.37962	0.570784	0.982867	0.601443	0.97385	0.946799	0.976893	0.937411	1.44274	0.658251	0.762346		0.568137	0.618792	1.54946	0.497616	1.07271	1.20183	1.20638	0.82084	1.5594	0.771752	0.539843		0.702434	0.204093	0.287611	0.403761	1.1781	0.457965	1.45524	0.647528	1.25553	0.309735	1.37845		0.703786	0.737194	4.29844	1.10245	3.40757	2.40535	4.28407	2.20782	5.92428	3.78619	0.845844
0.457169	0.715059	1.03697	0.537421	0.401262	0.762849	1.35695	0.615234	0.441839	1.34355	1.16455		1.1025	0.467819	1.38061	0.44994	0.954509	1.43027	0.776726	0.458481	2.62217	0.816448	0.399388		0.840708	0.191372	0.509956	0.154314	0.647124	0.287611	1.02369	1.19203	1.42146	0.558628	1.25514		1.49889	0.694878	4.098	0.712695	4.34298	4.52116	1.72513	2.58833	7.26058	3.34076	0.177011
1.30472	0.77908	0.955816	0.675383		0.844905			1.32552				0.860151	0.842273	1.57926	0.41915	0.407231	0.874056	0.984356	0.733016	1.04291	1.54946	0.548443		0.96792	0.430863	0.438606	0.630531	0.457412	0.21073	1.2688	0.438474	1.03982	0.978982	0.984535		1.05345	2.5167	4.38753	0.510022	3.15488	3.2294	2.92149	2.83862	4.85523	0.962138	0.569124
0.781755												0.860151	0.598927	1.50973	0.441994		1.01311			1.65872				1.10619	0.260509	0.558628	0.619469		0.420907			0.862832				0.884187	0.659243	5.54566	0.498886		2.38307			4.7216
1.02329												2.82821												1.80564												0.76406
0.963985												0.19205												0.841163												1.28837
0.926245												1.07013												0.666471												1.91575
1.27914												0.640168												0.716383												0.488461
0.840726												0.269444												0.970346												0.543356
3.3208												1.29918												1.7764												0.922944
0.512009												0.666295												0.818948												0.684301
0.491952												1.08575												0.544962												1.35135
0.236409												1.15999												0.879165												1.32404
0.438829												0.78879												0.98053												0.717366
												3.32831												3.34771												0.071906
												0.411042												0.340462												1.49455
												0.496515												0.459514												0.957493
												0.205521												0.476511												0.657426
												0.558614												0.375803												1.81863
