# Supplementary material for: Crispant analysis in zebrafish as a tool for rapid functional screening of disease-causing genes for bone fragility
Source: eLife. 2025 Jan 16;13:RP100060. doi: 10.7554/eLife.100060 (PMC11737869; doi:10.7554/eLife.100060)
Supplement: Figure 3—source data 1. [file elife-100060-fig3-data1.xlsx]

## Sheet: aldh7a1
	dpf	Scrambled	mbtps2
1	8	1
2	17	1
3	8	1
4	21	0
5	21	0
6	14	1
7	21	0
8	21	0
9	21	0
10	10	1
11	21	0
12	21	0
13	21	0
14	17	1
15	21	0
16	21	0
17	17	1
18	8	1
19	17	1
20	21	0
21	21	0
22	21	0
23	21	0
24	21	0
25	10	1
26	15	1
27	21	0
28	21	0
29	21	0
30	21	0
31	17	1
32	12	1
33	21	0
34	21	0
35	21	0
36	5	1
37	21	0
38	21	0
39	21	0
40	21	0
41	21	0
42	21	0
43	21	0
44	21	0
45	21	0
46	21	0
47	21	0
48	21	0
49	21	0
50	21	0
1	7		1
2	7		1
3	7		1
4	7		1
5	16		1
6	16		1
7	16		1
8	7		1
9	13		1
10	7		1
11	7		1
12	16		1
13	7		1
14	13		1
15	13		1
16	16		1
17	9		1
18	7		1
19	7		1
20	16		1
21	16		1
22	16		1
23	11		1
24	11		1
25	16		1
26	11		1
27	16		1
28	16		1
29	16		1
30	13		1
31	13		1
32	18		1
33	7		1
34	20		1
35	7		1
36	7		1
37	20		1
38	11		1
39	19		1
40	7		1

## Sheet: mbtps2
	dpf	Scrambled	mbtps2
1	8	1
2	17	1
3	8	1
4	30	0
5	30	0
6	14	1
7	30	0
8	30	0
9	17	1
10	10	1
11	30	0
12	30	0
13	30	0
14	30	0
15	8	1
16	30	0
17	30	0
18	8	1
19	30	0
20	30	0
21	30	0
22	30	0
23	30	0
24	30	0
25	10	1
26	15	1
27	30	0
28	30	0
29	30	0
30	30	0
31	17	1
32	12	1
33	12	1
34	17	1
35	17	1
36	5	1
37	21	0
38	19	1
39	30	0
40	30	0
41	30	0
42	30	0
43	30	0
44	30	0
45	21	1
46	20	1
47	30	0
48	30	0
49	30	0
50	30	0
1	14		1
2	9		1
3	12		1
4	23		1
5	17		1
6	17		1
7	20		1
8	8		1
9	17		1
10	6		1
11	17		1
12	8		1
13	18		1
14	19		1
15	16		1
16	8		1
17	18		1
18	8		1
19	28		1
20	17		1
21	25		1
22	15		1
23	12		1
24	8		1
25	17		1
26	21		1
27	17		1
28	16		1
29	22		1
30	17		1
31	18		1
32	20		1
33	20		1
34	24		1
35	23		1
36	19		1
37	19		1
38	28		1
39	29		1
40	29		0
41	29		1
42	30		0
43	28		1
44	28		1
45
