# Supplementary material for: Crispant analysis in zebrafish as a tool for rapid functional screening of disease-causing genes for bone fragility
Source: eLife. 2025 Jan 16;13:RP100060. doi: 10.7554/eLife.100060 (PMC11737869; doi:10.7554/eLife.100060)
Supplement: Figure 4—source data 1. [file elife-100060-fig4-data1.xlsx]

## Sheet: 90 dpf
esr1	Standard length (mm)	Head size	Head/SL	Diameter eye	Diameter eye/SL		scrambled	Standard length (mm)	Head size	Head/SL	Diameter eye	Diameter eye/SL
Fish 1	23.14	4.88	0.21089	2.04	0.088159		Fish 1	24.47	3.78	0.154475	1.52	0.0621169
Fish 2	24.47	4.75	0.194115	2.05	0.0837761		Fish 2	26.55	4.2	0.158192	1.78	0.0670433
Fish 3	20.53	4.28	0.208475	1.87	0.0910862		Fish 3	24.16	4.05	0.167632	1.84	0.0761589
Fish 4	26.33	4.71	0.178883	1.92	0.0729206		Fish 4	22.07	4.75	0.215224	2.05	0.0928863
Fish 5	22.97	4.69	0.204179	2.02	0.0879408		Fish 5	18.79	4.41	0.234699	1.91	0.10165
ifitm5	Standard length (mm)	Head size	Head/SL	Diameter eye	Diameter eye/SL
Fish 1	26.39	4.67	0.176961	1.98	0.0750284
Fish 2	19.86	4.34	0.21853	1.86	0.0936556
Fish 3	25.63	4.5	0.175575	1.96	0.0764729
Fish 4	26.03	4.51	0.173262	1.91	0.0733769
Fish 5	22.51	4.76	0.211462	1.98	0.0879609
serpinf1	Standard length (mm)	Head size	Head/SL	Diameter eye	Diameter eye/SL
Fish 1	21.91	4.17	0.190324	1.69	0.0771337
Fish 2	26.14	4.61	0.176358	1.84	0.0703902
Fish 3	23.98	4.65	0.193912	1.91	0.0796497
Fish 4	23.63	4.91	0.207787	2.02	0.0854846
Fish 5	18.78	4.86	0.258786	1.9	0.101171
sost	Standard length (mm)	Head size	Head/SL	Diameter eye	Diameter eye/SL
Fish 1	22.84
Fish 2	27.21	5.05	0.185594	2.01	0.0738699
Fish 3	24.28	4.71	0.193987	1.93	0.0794893
Fish 4	24	4.57	0.190417	1.86	0.0775
Fish 5	23.18	4.85	0.209232	1.97	0.0849871
sec24d	Standard length (mm)	Head size	Head/SL	Diameter eye	Diameter eye/SL
Fish 1	22.52	4.53	0.201155	1.8	0.079929
Fish 2	23.25	4.43	0.190538	1.92	0.0825806
Fish 3	22.18	4.25	0.191614	1.74	0.0784491
Fish 4	22.71	3.96	0.174373	1.84	0.0810216
Fish 5	20.82	4.05	0.194524	1.8	0.0864553
sparc	Standard length (mm)	Head size	Head/SL	Diameter eye	Diameter eye/SL
Fish 1	25.44	4.43	0.174135	1.8	0.0707547
Fish 2	23.58	4.75	0.201442	1.95	0.0826972
Fish 3	17.83	4.01	0.224902	1.67	0.0936624
Fish 4	22.55	4.84	0.214634	1.96	0.086918
Fish 5	21.58	4.66	0.215941	1.95	0.0903614
creb3l1	Standard length (mm)	Head size	Head/SL	Diameter eye	Diameter eye/SL
Fish 1	20.34	4.46	0.219272	1.79	0.0880039
Fish 2	24.15	4.72	0.195445	1.88	0.0778468
Fish 3	22.8	4.52	0.198246	1.91	0.0837719
Fish 4	23.4	4.5	0.192308	1.93	0.0824786
Fish 5	23.85	4.7	0.197065	1.93	0.0809224
daam2	Standard length (mm)	Head size	Head/SL	Diameter eye	Diameter eye/SL
Fish 1	27.11	4.97	0.183327	2.14	0.0789377
Fish 2	27	5.13	0.19	2	0.0740741
Fish 3	27.03	4.98	0.18424	2.03	0.0751017
Fish 4	25.99	4.92	0.189304	1.99	0.0765679
Fish 5	26.54	4.88	0.183873	2.01	0.0757347
scrambled	Standard length (mm)	Head size	Head/SL	Diameter eye	Diameter eye/SL
Fish 1	24.88	4.56	0.18328	1.91	0.0767685
Fish 2	23.02	4.31	0.187228	1.94	0.0842745
Fish 3	23.89	4.52	0.189201	1.85	0.0774383
Fish 4	24.03	4.25	0.176862	1.8	0.0749064
Fish 5	23.86	4.26	0.178541	1.92	0.0804694
